# Supplementary material for: Th17 Polarization under Hypoxia Results in Increased IL-10 Production in a Pathogen-Independent Manner
Source: Front Immunol. 2017 Jun 19;8:698. doi: 10.3389/fimmu.2017.00698 (PMC5474482; doi:10.3389/fimmu.2017.00698)
Supplement: Table S1 — Summary of differentially expressed genes from the study. [file Table_1.XLSX]

## Sheet: venngenes_effectspergroup
	Th0 1% - Th0 21%	Th17 1% - Th17 21%	Th17 CSE 1% - Th17 CSE 21%	pattern
ABCB6	1	1	1	1x1x1
ACTR1A	-1	-1	-1	1x1x1
ADM	1	1	1	1x1x1
ADORA2B	1	1	1	1x1x1
ADPRHL2	1	1	1	1x1x1
AK3L1	1	1	1	1x1x1
ALDOA	1	1	1	1x1x1
ALDOC	1	1	1	1x1x1
ALKBH5	1	1	1	1x1x1
ANKRD37	1	1	1	1x1x1
ANKZF1	1	1	1	1x1x1
AP3S1	1	1	1	1x1x1
ARID3A	1	1	1	1x1x1
ASCL2	1	1	1	1x1x1
BCKDK	1	1	1	1x1x1
BCOR	1	1	1	1x1x1
BEND5	1	1	1	1x1x1
BNIP3	1	1	1	1x1x1
BNIP3L	1	1	1	1x1x1
BRP44L	-1	-1	-1	1x1x1
C18ORF19	1	1	1	1x1x1
C1ORF124	-1	-1	-1	1x1x1
C1ORF165	1	1	1	1x1x1
C1ORF19	-1	-1	-1	1x1x1
C1ORF51	1	1	1	1x1x1
C20ORF20	1	1	1	1x1x1
C5ORF44	-1	-1	-1	1x1x1
C7ORF43	-1	-1	-1	1x1x1
C7ORF68	1	1	1	1x1x1
C9ORF142	-1	-1	-1	1x1x1
CASP1	-1	-1	-1	1x1x1
CCDC64B	1	1	1	1x1x1
CCDC74B	1	1	1	1x1x1
CD300A	1	1	1	1x1x1
CNDP2	-1	-1	-1	1x1x1
CORO1B	1	1	1	1x1x1
CRKL	1	1	1	1x1x1
DARS	1	1	1	1x1x1
DDX5	-1	-1	-1	1x1x1
DPYSL4	1	1	1	1x1x1
DUSP3	1	1	1	1x1x1
EGLN1	1	1	1	1x1x1
ENO2	1	1	1	1x1x1
EPN1	1	1	1	1x1x1
ERCC2	-1	-1	-1	1x1x1
EXOC3	1	1	1	1x1x1
EXOSC1	-1	-1	-1	1x1x1
FAM127A	1	1	1	1x1x1
FAM139A	1	1	1	1x1x1
FAM162A	1	1	1	1x1x1
FAM57A	1	1	1	1x1x1
FAM58A	-1	-1	-1	1x1x1
FAM80A	1	1	1	1x1x1
FGF11	1	1	1	1x1x1
FLAD1	-1	-1	-1	1x1x1
FSCN1	1	1	1	1x1x1
FUT11	1	1	1	1x1x1
GBE1	1	1	1	1x1x1
GCHFR	1	1	1	1x1x1
GOT1	-1	-1	-1	1x1x1
GPI	1	1	1	1x1x1
HK2	1	1	1	1x1x1
HPCAL1	1	1	1	1x1x1
HS.10862	1	1	1	1x1x1
HSPBAP1	-1	-1	-1	1x1x1
IGFBP2	1	1	1	1x1x1
ING2	1	1	1	1x1x1
INSIG2	1	1	1	1x1x1
ITGA5	1	1	1	1x1x1
JAM3	1	1	1	1x1x1
JMJD1A	1	1	1	1x1x1
JMJD2B	1	1	1	1x1x1
KCTD11	1	1	1	1x1x1
KDM5B	1	1	1	1x1x1
KISS1R	1	1	1	1x1x1
LACTB2	-1	-1	-1	1x1x1
LOC100129169	1	1	1	1x1x1
LOC100131767	1	1	1	1x1x1
LOC100132377	1	1	1	1x1x1
LOC146439	1	1	1	1x1x1
LOC286016	1	1	1	1x1x1
LOC346085	1	1	1	1x1x1
LOC391075	1	1	1	1x1x1
LOC644237	1	1	1	1x1x1
LOC644774	1	1	1	1x1x1
LOC647349	1	1	1	1x1x1
LOC731007	1	1	1	1x1x1
LOC732165	1	1	1	1x1x1
LONP1	1	1	1	1x1x1
MGAT1	1	1	1	1x1x1
MGST2	1	1	1	1x1x1
MIF	1	1	1	1x1x1
MKNK2	1	1	1	1x1x1
MOBKL2A	1	1	1	1x1x1
MPI	1	1	1	1x1x1
MT3	1	1	1	1x1x1
NCKIPSD	1	1	1	1x1x1
NDRG1	1	1	1	1x1x1
NDUFS8	-1	-1	-1	1x1x1
NELF	1	1	1	1x1x1
NOL3	1	1	1	1x1x1
NRN1	1	1	1	1x1x1
OGFOD1	-1	-1	-1	1x1x1
OXSM	1	1	1	1x1x1
OXSR1	1	1	1	1x1x1
P2RY11	1	1	1	1x1x1
P4HA1	1	1	1	1x1x1
P4HA2	1	1	1	1x1x1
PAM	1	1	1	1x1x1
PFKFB4	1	1	1	1x1x1
PFKP	1	1	1	1x1x1
PGK1	1	1	1	1x1x1
PGM1	1	1	1	1x1x1
PIGK	-1	-1	-1	1x1x1
PNCK	1	1	1	1x1x1
POLS	1	1	1	1x1x1
PPFIA4	1	1	1	1x1x1
PPME1	1	1	1	1x1x1
PPP1R13L	1	1	1	1x1x1
PREB	-1	-1	-1	1x1x1
PSD4	1	1	1	1x1x1
PTPMT1	-1	-1	-1	1x1x1
PTPRF	1	1	1	1x1x1
PUS3	-1	-1	-1	1x1x1
RASSF1	1	1	1	1x1x1
RCAN1	-1	-1	-1	1x1x1
RLF	1	1	1	1x1x1
RNF24	1	1	1	1x1x1
RNMT	1	1	1	1x1x1
S100A10	1	1	1	1x1x1
SAP30	1	1	1	1x1x1
SEC61B	-1	-1	-1	1x1x1
SIT1	1	1	1	1x1x1
SLC16A3	1	1	1	1x1x1
SLC25A20	-1	-1	-1	1x1x1
SLC2A1	1	1	1	1x1x1
SLC2A3	1	1	1	1x1x1
SLC41A2	1	1	1	1x1x1
SPSB2	-1	-1	-1	1x1x1
STAT3	1	1	1	1x1x1
STC2	1	1	1	1x1x1
TAF9L	-1	-1	-1	1x1x1
TBC1D9B	1	1	1	1x1x1
TCHP	-1	-1	-1	1x1x1
TMED1	1	1	1	1x1x1
TMEM206	-1	-1	-1	1x1x1
TRIM26	-1	-1	-1	1x1x1
TSEN15	-1	-1	-1	1x1x1
UAP1L1	1	1	1	1x1x1
UBR5	1	1	1	1x1x1
UPK1A	1	1	1	1x1x1
UPRT	1	1	1	1x1x1
USP37	1	1	1	1x1x1
VEGFA	1	1	1	1x1x1
VEZT	1	1	1	1x1x1
VKORC1	1	1	1	1x1x1
WDR54	1	1	1	1x1x1
WDR8	-1	-1	-1	1x1x1
WSB1	1	1	1	1x1x1
YEATS2	1	1	1	1x1x1
ZNF256	1	1	1	1x1x1
ZNF30	-1	-1	-1	1x1x1
ZNF318	1	1	1	1x1x1
ZNF395	1	1	1	1x1x1
ZNF653	1	1	1	1x1x1
ZNF654	1	1	1	1x1x1
ABCF2	-1	-1	0	1x1x0
ABHD3	-1	-1	0	1x1x0
ANAPC7	-1	-1	0	1x1x0
APOO	-1	-1	0	1x1x0
ARHGEF7	1	1	0	1x1x0
ATG9A	1	1	0	1x1x0
C16ORF61	-1	-1	0	1x1x0
C18ORF8	-1	-1	0	1x1x0
C19ORF36	1	1	0	1x1x0
C22ORF28	-1	-1	0	1x1x0
C6ORF190	1	1	0	1x1x0
FAM13A	1	1	0	1x1x0
FBXL11	1	1	0	1x1x0
FBXL8	1	1	0	1x1x0
FNBP1	1	1	0	1x1x0
GTF2H2B	-1	-1	0	1x1x0
HERC3	1	1	0	1x1x0
HS.135282	1	1	0	1x1x0
HS.475334	1	1	0	1x1x0
HS.572538	1	1	0	1x1x0
HSF4	1	1	0	1x1x0
KIAA1688	1	1	0	1x1x0
KRBA1	1	1	0	1x1x0
LGALS8	1	1	0	1x1x0
LIN52	-1	-1	0	1x1x0
LOC100130154	1	1	0	1x1x0
LOC100132324	1	1	0	1x1x0
LOC154761	1	1	0	1x1x0
LOC284023	1	1	0	1x1x0
LOC401152	1	1	0	1x1x0
LOC441253	1	1	0	1x1x0
LOC652470	1	-1	0	1x1x0
LOC730316	1	1	0	1x1x0
LSM10	-1	-1	0	1x1x0
MIOS	1	1	0	1x1x0
MPV17L2	-1	-1	0	1x1x0
MRPL38	-1	-1	0	1x1x0
MRPS15	-1	-1	0	1x1x0
MTR	1	1	0	1x1x0
MXI1	1	1	0	1x1x0
NDUFB6	-1	-1	0	1x1x0
PFKFB3	1	1	0	1x1x0
PKIA	1	1	0	1x1x0
PLCG1	1	1	0	1x1x0
PNPLA7	1	1	0	1x1x0
POM121C	1	1	0	1x1x0
PPP1R3E	1	1	0	1x1x0
RAB20	1	1	0	1x1x0
RNF165	1	1	0	1x1x0
RXRA	1	1	0	1x1x0
SETD4	-1	-1	0	1x1x0
SLC35E1	1	1	0	1x1x0
TAP2	-1	-1	0	1x1x0
UBA3	-1	-1	0	1x1x0
UBE2E3	-1	-1	0	1x1x0
USP42	-1	-1	0	1x1x0
VPS45	-1	-1	0	1x1x0
WDR53	-1	-1	0	1x1x0
WDR60	1	1	0	1x1x0
ZNF160	1	1	0	1x1x0
GAPDH	1	0	1	1x0x1
ILVBL	1	0	1	1x0x1
LOC729708	1	0	1	1x0x1
MTP18	1	0	1	1x0x1
NARF	1	0	1	1x0x1
SDK2	1	0	1	1x0x1
TPI1	1	0	1	1x0x1
VGLL4	1	0	1	1x0x1
AKR7A3	1	0	0	1x0x0
APOL6	-1	0	0	1x0x0
C17ORF37	-1	0	0	1x0x0
CD72	1	0	0	1x0x0
DDT	1	0	0	1x0x0
FBLN5	1	0	0	1x0x0
FBXL10	1	0	0	1x0x0
FOXN2	1	0	0	1x0x0
HS.559234	-1	0	0	1x0x0
IARS	-1	0	0	1x0x0
KLRAQ1	1	0	0	1x0x0
LOC100133477	-1	0	0	1x0x0
LOC284422	1	0	0	1x0x0
LOC650681	1	0	0	1x0x0
LOC650755	-1	0	0	1x0x0
MARS	-1	0	0	1x0x0
N4BP3	1	0	0	1x0x0
NFATC1	1	0	0	1x0x0
PCK2	-1	0	0	1x0x0
RSBN1	1	0	0	1x0x0
SAMHD1	-1	0	0	1x0x0
SLC4A1AP	-1	0	0	1x0x0
TDRD5	1	0	0	1x0x0
ZNF280D	1	0	0	1x0x0
ZNF589	1	0	0	1x0x0
ZNF770	1	0	0	1x0x0
ABCA1	0	1	1	0x1x1
AGTPBP1	0	1	1	0x1x1
ANG	0	1	1	0x1x1
ANGPTL6	0	1	1	0x1x1
ANO6	0	1	1	0x1x1
APOL3	0	-1	-1	0x1x1
ARFGAP2	0	-1	-1	0x1x1
ARHGAP19	0	1	1	0x1x1
ASPSCR1	0	-1	-1	0x1x1
ATG4A	0	-1	-1	0x1x1
ATP5EP2	0	-1	-1	0x1x1
ATP5L	0	-1	-1	0x1x1
ATP5S	0	-1	-1	0x1x1
ATP6V0E2	0	-1	-1	0x1x1
B4GALT5	0	1	1	0x1x1
BCAT1	0	1	1	0x1x1
BCL2L2	0	1	1	0x1x1
BECN1	0	-1	-1	0x1x1
BLMH	0	-1	-1	0x1x1
BLVRA	0	-1	-1	0x1x1
BSPRY	0	1	1	0x1x1
C11ORF48	0	-1	-1	0x1x1
C15ORF48	0	1	1	0x1x1
C16ORF30	0	-1	-1	0x1x1
C1ORF56	0	-1	-1	0x1x1
C1ORF59	0	-1	-1	0x1x1
C22ORF25	0	-1	-1	0x1x1
C6ORF108	0	-1	-1	0x1x1
C9ORF16	0	-1	-1	0x1x1
C9ORF37	0	-1	-1	0x1x1
CA2	0	1	1	0x1x1
CA9	0	1	1	0x1x1
CARD17	0	-1	-1	0x1x1
CASP4	0	-1	-1	0x1x1
CD2BP2	0	-1	-1	0x1x1
CDK5	0	-1	-1	0x1x1
CENTB2	0	-1	-1	0x1x1
CHFR	0	-1	-1	0x1x1
CHP	0	-1	-1	0x1x1
CHSY1	0	1	1	0x1x1
CIC	0	1	1	0x1x1
CNPY4	0	-1	-1	0x1x1
COL6A3	0	1	1	0x1x1
CRELD2	0	-1	-1	0x1x1
CSF1R	0	1	1	0x1x1
DDIT4L	0	1	1	0x1x1
DECR1	0	-1	-1	0x1x1
DENND2D	0	-1	-1	0x1x1
DFFB	0	-1	-1	0x1x1
DHRS9	0	1	1	0x1x1
DIMT1L	0	-1	-1	0x1x1
DLK2	0	1	1	0x1x1
EIF3K	0	-1	-1	0x1x1
EIF4H	0	1	1	0x1x1
ELMOD2	0	-1	-1	0x1x1
ERF	0	1	1	0x1x1
ERO1L	0	1	1	0x1x1
FAM100A	0	-1	-1	0x1x1
FAM108B1	0	-1	-1	0x1x1
FAM115C	0	1	1	0x1x1
FAM127B	0	1	1	0x1x1
FAM53C	0	1	1	0x1x1
FBXL18	0	-1	-1	0x1x1
FIS1	0	-1	-1	0x1x1
G0S2	0	1	1	0x1x1
GALT	0	-1	-1	0x1x1
GIPC1	0	-1	-1	0x1x1
GMFG	0	-1	-1	0x1x1
GNA15	0	1	1	0x1x1
GPR89A	0	-1	-1	0x1x1
GRIN3B	0	1	1	0x1x1
GYG1	0	-1	-1	0x1x1
HACL1	0	-1	-1	0x1x1
HDAC3	0	1	1	0x1x1
HOOK2	0	1	1	0x1x1
HS.413494	0	-1	-1	0x1x1
HS.437111	0	1	1	0x1x1
HS.559770	0	1	1	0x1x1
IKBKG	0	-1	-1	0x1x1
IRF4	0	1	1	0x1x1
ISCU	0	-1	-1	0x1x1
JAG2	0	1	1	0x1x1
KIAA0368	0	1	1	0x1x1
KIAA1191	0	1	1	0x1x1
KLHL35	0	1	1	0x1x1
LCK	0	-1	-1	0x1x1
LOC286208	0	-1	-1	0x1x1
LOC400890	0	1	1	0x1x1
LOC440731	0	1	1	0x1x1
LOC642590	0	1	1	0x1x1
LOC642975	0	-1	-1	0x1x1
LOC646347	0	1	1	0x1x1
LOC728014	0	-1	-1	0x1x1
LOC729021	0	1	1	0x1x1
LOC731954	0	1	1	0x1x1
LRRC42	0	1	1	0x1x1
LYSMD4	0	-1	-1	0x1x1
MAP2K1	0	1	1	0x1x1
MAP3K5	0	-1	-1	0x1x1
MARCH2	0	-1	-1	0x1x1
MFSD10	0	1	1	0x1x1
MGC16384	0	1	1	0x1x1
MGC87042	0	1	1	0x1x1
MLLT11	0	1	1	0x1x1
MORF4L2	0	1	1	0x1x1
MPPE1	0	-1	-1	0x1x1
MYO1B	0	1	1	0x1x1
MYO1G	0	1	1	0x1x1
NAPSA	0	1	1	0x1x1
NCOR2	0	1	1	0x1x1
NDRG4	0	1	1	0x1x1
NFIL3	0	1	1	0x1x1
NNAT	0	1	1	0x1x1
NOL12	0	-1	-1	0x1x1
NPW	0	1	1	0x1x1
OSBPL10	0	1	1	0x1x1
OSTM1	0	-1	-1	0x1x1
OXCT2	0	1	1	0x1x1
P4HB	0	1	1	0x1x1
PALLD	0	1	1	0x1x1
PAQR7	0	1	1	0x1x1
PCYT2	0	-1	-1	0x1x1
PDCD2	0	-1	-1	0x1x1
PDE4D	0	1	1	0x1x1
PERP	0	1	1	0x1x1
PGRMC2	0	1	1	0x1x1
PHF13	0	1	1	0x1x1
PHF23	0	-1	-1	0x1x1
PIGA	0	1	1	0x1x1
PLIN2	0	1	1	0x1x1
PLOD2	0	1	1	0x1x1
PLP2	0	1	1	0x1x1
PLSCR3	0	-1	-1	0x1x1
PLXNA1	0	1	1	0x1x1
PNOC	0	1	1	0x1x1
POLR3E	0	-1	-1	0x1x1
PRKCD	0	1	1	0x1x1
PSME4	0	-1	-1	0x1x1
PSMG3	0	-1	-1	0x1x1
PTRF	0	1	1	0x1x1
PTRH1	0	-1	-1	0x1x1
PVRIG	0	-1	-1	0x1x1
RAB13	0	1	1	0x1x1
RHPN2	0	1	1	0x1x1
RIMKLA	0	1	1	0x1x1
RNF123	0	-1	-1	0x1x1
RNF181	0	1	1	0x1x1
ROBLD3	0	-1	-1	0x1x1
RP11-529I10.4	0	1	1	0x1x1
SDHAF2	0	-1	-1	0x1x1
SEC61G	0	1	1	0x1x1
SHF	0	1	1	0x1x1
SLC12A9	0	-1	-1	0x1x1
SLC15A4	0	1	1	0x1x1
SLC25A36	0	1	1	0x1x1
SLC43A3	0	1	1	0x1x1
SLC46A3	0	-1	-1	0x1x1
SLCO4A1	0	1	1	0x1x1
SLFN11	0	1	1	0x1x1
SLFN5	0	-1	-1	0x1x1
SMS	0	1	1	0x1x1
SNAPC5	0	-1	-1	0x1x1
SNRNP35	0	-1	-1	0x1x1
SNX17	0	-1	-1	0x1x1
SP110	0	-1	-1	0x1x1
SPAG4	0	1	1	0x1x1
SPG3A	0	1	1	0x1x1
SPRED2	0	1	1	0x1x1
STAU1	0	1	1	0x1x1
STK35	0	1	1	0x1x1
SUCLG1	0	-1	-1	0x1x1
SVIL	0	1	1	0x1x1
TAF10	0	-1	-1	0x1x1
TAF12	0	-1	-1	0x1x1
TECPR1	0	-1	-1	0x1x1
TFG	0	1	1	0x1x1
TLE4	0	-1	-1	0x1x1
TMCO3	0	1	1	0x1x1
TMEM138	0	-1	-1	0x1x1
TMEM175	0	-1	-1	0x1x1
TMEM204	0	-1	-1	0x1x1
TMEM45A	0	1	1	0x1x1
TMEM50B	0	-1	-1	0x1x1
TMEM9B	0	-1	-1	0x1x1
TNFRSF8	0	1	1	0x1x1
TNIP3	0	1	1	0x1x1
TRAPPC3	0	-1	-1	0x1x1
TRIM22	0	-1	-1	0x1x1
TRIM24	0	1	1	0x1x1
TRIP6	0	1	1	0x1x1
TRMT12	0	-1	-1	0x1x1
TRPC1	0	1	1	0x1x1
TSPAN9	0	1	1	0x1x1
TTC13	0	-1	-1	0x1x1
UAP1	0	1	1	0x1x1
UBE2Z	0	1	1	0x1x1
UBLCP1	0	-1	-1	0x1x1
UBR4	0	1	1	0x1x1
USP4	0	-1	-1	0x1x1
VDAC1	0	1	1	0x1x1
VPS16	0	-1	-1	0x1x1
VPS36	0	-1	-1	0x1x1
WDR7	0	-1	-1	0x1x1
ZFAND2B	0	-1	-1	0x1x1
ZNF174	0	-1	-1	0x1x1
ZNF641	0	-1	-1	0x1x1
ZSWIM5	0	1	1	0x1x1
ABCB9	0	1	0	0x1x0
ABHD6	0	-1	0	0x1x0
ACAP2	0	-1	0	0x1x0
ACOX1	0	-1	0	0x1x0
ACP2	0	-1	0	0x1x0
ACSL3	0	-1	0	0x1x0
ACTR10	0	-1	0	0x1x0
ACTRT1	0	-1	0	0x1x0
ADA	0	-1	0	0x1x0
ADCY7	0	1	0	0x1x0
ADORA2A	0	1	0	0x1x0
AFF1	0	1	0	0x1x0
AFMID	0	1	0	0x1x0
AGFG2	0	-1	0	0x1x0
AGMAT	0	-1	0	0x1x0
AGPAT6	0	1	0	0x1x0
AIFM1	0	-1	0	0x1x0
AIG1	0	1	0	0x1x0
AK2	0	1	0	0x1x0
AKAP11	0	1	0	0x1x0
AKAP12	0	1	0	0x1x0
AKIRIN1	0	-1	0	0x1x0
AKR7A2	0	1	0	0x1x0
AKTIP	0	-1	0	0x1x0
ALDH9A1	0	-1	0	0x1x0
ALG9	0	1	0	0x1x0
ALOX12B	0	1	0	0x1x0
ANAPC4	0	-1	0	0x1x0
ANGPTL4	0	1	0	0x1x0
ANKFY1	0	-1	0	0x1x0
ANKMY2	0	1	0	0x1x0
ANKRD20A1	0	1	0	0x1x0
ANKRD57	0	1	0	0x1x0
ANKS1B	0	-1	0	0x1x0
ANXA7	0	-1	0	0x1x0
AP1M1	0	-1	0	0x1x0
AP3M1	0	-1	0	0x1x0
APEH	0	-1	0	0x1x0
APLP2	0	1	0	0x1x0
APOA1	0	1	0	0x1x0
APOA1BP	0	-1	0	0x1x0
AQP3	0	-1	0	0x1x0
ARAP1	0	1	0	0x1x0
ARD1A	0	-1	0	0x1x0
ARG2	0	1	0	0x1x0
ARHGEF10	0	1	0	0x1x0
ARHGEF3	0	-1	0	0x1x0
ARHGEF5	0	1	0	0x1x0
ARL3	0	-1	0	0x1x0
ARMCX2	0	1	0	0x1x0
ARPC1B	0	-1	0	0x1x0
ASAH1	0	-1	0	0x1x0
ASF1A	0	-1	0	0x1x0
ASGR1	0	1	0	0x1x0
ASTE1	0	-1	0	0x1x0
ATAD1	0	-1	0	0x1x0
ATG12	0	1	0	0x1x0
ATL1	0	1	0	0x1x0
ATP5B	0	-1	0	0x1x0
ATP6V0A4	0	1	0	0x1x0
ATP6V0B	0	-1	0	0x1x0
ATP6V1E1	0	-1	0	0x1x0
ATP7A	0	1	0	0x1x0
ATP9A	0	1	0	0x1x0
AXUD1	0	1	0	0x1x0
B3GNT4	0	1	0	0x1x0
BAGE5	0	1	0	0x1x0
BAK1	0	-1	0	0x1x0
BANP	0	1	0	0x1x0
BARX1	0	1	0	0x1x0
BAT3	0	1	0	0x1x0
BAT5	0	-1	0	0x1x0
BCL2L13	0	1	0	0x1x0
BIRC3	0	1	0	0x1x0
BP75	0	-1	0	0x1x0
BRD7	0	-1	0	0x1x0
BRD7P2	0	-1	0	0x1x0
BRMS1	0	-1	0	0x1x0
BTBD2	0	1	0	0x1x0
C10ORF54	0	-1	0	0x1x0
C11ORF73	0	-1	0	0x1x0
C12ORF11	0	1	0	0x1x0
C12ORF23	0	1	0	0x1x0
C12ORF24	0	1	0	0x1x0
C12ORF5	0	-1	0	0x1x0
C13ORF15	0	1	0	0x1x0
C13ORF16	0	1	0	0x1x0
C14ORF129	0	-1	0	0x1x0
C14ORF132	0	1	0	0x1x0
C14ORF138	0	-1	0	0x1x0
C14ORF139	0	1	0	0x1x0
C14ORF142	0	-1	0	0x1x0
C14ORF169	0	-1	0	0x1x0
C14ORF43	0	1	0	0x1x0
C15ORF24	0	-1	0	0x1x0
C16ORF57	0	-1	0	0x1x0
C17ORF38	0	1	0	0x1x0
C17ORF63	0	-1	0	0x1x0
C19ORF10	0	-1	0	0x1x0
C1ORF113	0	1	0	0x1x0
C1ORF97	0	1	0	0x1x0
C20ORF30	0	-1	0	0x1x0
C20ORF46	0	1	0	0x1x0
C20ORF7	0	-1	0	0x1x0
C21ORF51	0	-1	0	0x1x0
C2ORF18	0	-1	0	0x1x0
C2ORF28	0	-1	0	0x1x0
C3ORF18	0	1	0	0x1x0
C3ORF58	0	1	0	0x1x0
C4ORF47	0	1	0	0x1x0
C4ORF49	0	1	0	0x1x0
C5ORF15	0	1	0	0x1x0
C5ORF22	0	-1	0	0x1x0
C6ORF115	0	-1	0	0x1x0
C6ORF136	0	-1	0	0x1x0
C6ORF153	0	-1	0	0x1x0
C7ORF26	0	-1	0	0x1x0
C7ORF28A	0	-1	0	0x1x0
C8ORF16	0	1	0	0x1x0
C9ORF102	0	1	0	0x1x0
C9ORF114	0	-1	0	0x1x0
C9ORF164	0	1	0	0x1x0
C9ORF45	0	1	0	0x1x0
C9ORF78	0	-1	0	0x1x0
CA12	0	1	0	0x1x0
CAB39	0	-1	0	0x1x0
CABP1	0	1	0	0x1x0
CACYBP	0	-1	0	0x1x0
CALHM2	0	-1	0	0x1x0
CALM2	0	-1	0	0x1x0
CAMK1D	0	1	0	0x1x0
CAPZB	0	-1	0	0x1x0
CASP10	0	-1	0	0x1x0
CASP6	0	-1	0	0x1x0
CCDC102A	0	1	0	0x1x0
CCDC117	0	-1	0	0x1x0
CCDC12	0	-1	0	0x1x0
CCDC132	0	-1	0	0x1x0
CCDC141	0	-1	0	0x1x0
CCDC151	0	1	0	0x1x0
CCDC46	0	1	0	0x1x0
CCDC69	0	-1	0	0x1x0
CCDC84	0	-1	0	0x1x0
CCHCR1	0	1	0	0x1x0
CCL28	0	1	0	0x1x0
CCL4	0	-1	0	0x1x0
CCNG2	0	1	0	0x1x0
CCT6A	0	-1	0	0x1x0
CD109	0	1	0	0x1x0
CD19	0	1	0	0x1x0
CD226	0	1	0	0x1x0
CD52	0	-1	0	0x1x0
CD58	0	-1	0	0x1x0
CD79B	0	-1	0	0x1x0
CDC2L1	0	-1	0	0x1x0
CDC2L2	0	-1	0	0x1x0
CDC2L6	0	1	0	0x1x0
CDH1	0	1	0	0x1x0
CDH3	0	1	0	0x1x0
CDK5R1	0	1	0	0x1x0
CDK5RAP1	0	-1	0	0x1x0
CDR2	0	-1	0	0x1x0
CDRT4	0	1	0	0x1x0
CEBPD	0	1	0	0x1x0
CECR5	0	1	0	0x1x0
CES8	0	1	0	0x1x0
CGN	0	1	0	0x1x0
CHD3	0	1	0	0x1x0
CHD9	0	1	0	0x1x0
CHUK	0	-1	0	0x1x0
CIAPIN1	0	-1	0	0x1x0
CLASP1	0	1	0	0x1x0
CLCN7	0	-1	0	0x1x0
CLDN12	0	1	0	0x1x0
CLDND1	0	-1	0	0x1x0
CLEC12A	0	1	0	0x1x0
CLMN	0	1	0	0x1x0
CLTB	0	-1	0	0x1x0
CNKSR3	0	1	0	0x1x0
CNOT10	0	1	0	0x1x0
CNOT8	0	1	0	0x1x0
CNTNAP1	0	1	0	0x1x0
COG2	0	-1	0	0x1x0
COL4A3BP	0	1	0	0x1x0
COL7A1	0	1	0	0x1x0
COPB1	0	1	0	0x1x0
COPG	0	1	0	0x1x0
COQ10B	0	-1	0	0x1x0
COX5A	0	-1	0	0x1x0
COX6C	0	-1	0	0x1x0
CPNE3	0	1	0	0x1x0
CPSF2	0	-1	0	0x1x0
CPT1A	0	-1	0	0x1x0
CRABP2	0	1	0	0x1x0
CRYBB2	0	1	0	0x1x0
CRYBG3	0	1	0	0x1x0
CSNK1G2	0	-1	0	0x1x0
CSRP2	0	1	0	0x1x0
CSTF3	0	-1	0	0x1x0
CT45A4	0	1	0	0x1x0
CTTN	0	1	0	0x1x0
CXCL12	0	1	0	0x1x0
CXCR7	0	-1	0	0x1x0
CXORF56	0	-1	0	0x1x0
CXORF57	0	1	0	0x1x0
CYLD	0	-1	0	0x1x0
D2HGDH	0	1	0	0x1x0
DACT1	0	1	0	0x1x0
DAP3	0	-1	0	0x1x0
DAPP1	0	1	0	0x1x0
DBNDD1	0	1	0	0x1x0
DCK	0	-1	0	0x1x0
DCUN1D1	0	-1	0	0x1x0
DDA1	0	-1	0	0x1x0
DDN	0	1	0	0x1x0
DDX28	0	-1	0	0x1x0
DDX41	0	1	0	0x1x0
DDX46	0	-1	0	0x1x0
DDX50	0	1	0	0x1x0
DDX52	0	-1	0	0x1x0
DEGS1	0	1	0	0x1x0
DHRS2	0	1	0	0x1x0
DHX32	0	1	0	0x1x0
DHX40	0	1	0	0x1x0
DHX8	0	-1	0	0x1x0
DIS3L	0	-1	0	0x1x0
DIS3L2	0	1	0	0x1x0
DIXDC1	0	1	0	0x1x0
DLEC1	0	-1	0	0x1x0
DNAJB11	0	-1	0	0x1x0
DNAJB2	0	1	0	0x1x0
DNAJC10	0	-1	0	0x1x0
DNAJC18	0	1	0	0x1x0
DNAJC24	0	-1	0	0x1x0
DNTTIP1	0	-1	0	0x1x0
DOCK11	0	-1	0	0x1x0
DOCK7	0	1	0	0x1x0
DOK4	0	1	0	0x1x0
DOLK	0	-1	0	0x1x0
DOLPP1	0	-1	0	0x1x0
DPAGT1	0	-1	0	0x1x0
DPH3	0	-1	0	0x1x0
DPY19L4	0	1	0	0x1x0
DRD1	0	-1	0	0x1x0
DTNA	0	1	0	0x1x0
DTNBP1	0	-1	0	0x1x0
DUS1L	0	-1	0	0x1x0
DYNC1H1	0	1	0	0x1x0
DYNLRB1	0	-1	0	0x1x0
E2F4	0	-1	0	0x1x0
E2F5	0	1	0	0x1x0
EBI2	0	1	0	0x1x0
ECHDC3	0	1	0	0x1x0
EDEM3	0	-1	0	0x1x0
EDN1	0	1	0	0x1x0
EEF1A2	0	1	0	0x1x0
EFCAB3	0	1	0	0x1x0
EFEMP2	0	1	0	0x1x0
EGR2	0	1	0	0x1x0
EHBP1	0	1	0	0x1x0
EID2	0	-1	0	0x1x0
EIF2B2	0	-1	0	0x1x0
EIF3J	0	-1	0	0x1x0
ELAC2	0	-1	0	0x1x0
ELL2	0	1	0	0x1x0
ELMO2	0	-1	0	0x1x0
ELP2	0	1	0	0x1x0
EMD	0	1	0	0x1x0
ENO3	0	1	0	0x1x0
ENPP2	0	-1	0	0x1x0
EPN2	0	1	0	0x1x0
EPOR	0	1	0	0x1x0
ERCC5	0	1	0	0x1x0
ERRFI1	0	1	0	0x1x0
ESCO1	0	1	0	0x1x0
ESRRAP2	0	-1	0	0x1x0
ETFA	0	-1	0	0x1x0
ETS2	0	1	0	0x1x0
EVI5L	0	-1	0	0x1x0
EXD2	0	1	0	0x1x0
EXOC2	0	1	0	0x1x0
EXOSC6	0	-1	0	0x1x0
EZR	0	-1	0	0x1x0
F12	0	1	0	0x1x0
FABP6	0	1	0	0x1x0
FAM110C	0	1	0	0x1x0
FAM118B	0	-1	0	0x1x0
FAM119A	0	1	0	0x1x0
FAM119B	0	1	0	0x1x0
FAM14B	0	-1	0	0x1x0
FAM153B	0	1	0	0x1x0
FAM46A	0	1	0	0x1x0
FAM69B	0	1	0	0x1x0
FAM73B	0	-1	0	0x1x0
FAM82A2	0	-1	0	0x1x0
FAM83H	0	1	0	0x1x0
FANCE	0	-1	0	0x1x0
FAR1	0	-1	0	0x1x0
FBXO15	0	1	0	0x1x0
FBXO22	0	-1	0	0x1x0
FBXO6	0	-1	0	0x1x0
FBXW5	0	-1	0	0x1x0
FDX1L	0	-1	0	0x1x0
FEM1C	0	1	0	0x1x0
FICD	0	-1	0	0x1x0
FKBP9L	0	1	0	0x1x0
FLJ20273	0	1	0	0x1x0
FLJ38482	0	-1	0	0x1x0
FLJ40722	0	1	0	0x1x0
FLJ44342	0	1	0	0x1x0
FMNL2	0	1	0	0x1x0
FNDC3A	0	1	0	0x1x0
FNTB	0	1	0	0x1x0
FRAP1	0	-1	0	0x1x0
FRAT2	0	-1	0	0x1x0
FSBP	0	1	0	0x1x0
FSTL3	0	1	0	0x1x0
FTSJD2	0	-1	0	0x1x0
FUT7	0	-1	0	0x1x0
G6PD	0	-1	0	0x1x0
GAD1	0	1	0	0x1x0
GALNT2	0	1	0	0x1x0
GALNTL4	0	1	0	0x1x0
GATA3	0	-1	0	0x1x0
GATM	0	1	0	0x1x0
GBA2	0	-1	0	0x1x0
GBP1	0	-1	0	0x1x0
GBP4	0	-1	0	0x1x0
GCH1	0	-1	0	0x1x0
GFM1	0	-1	0	0x1x0
GFM2	0	-1	0	0x1x0
GHITM	0	-1	0	0x1x0
GK5	0	-1	0	0x1x0
GLRX3	0	-1	0	0x1x0
GM2A	0	1	0	0x1x0
GMPPB	0	-1	0	0x1x0
GNA11	0	1	0	0x1x0
GNRH1	0	1	0	0x1x0
GOLGB1	0	1	0	0x1x0
GORASP1	0	-1	0	0x1x0
GORASP2	0	-1	0	0x1x0
GOSR2	0	-1	0	0x1x0
GPD1L	0	-1	0	0x1x0
GPR160	0	1	0	0x1x0
GPR172A	0	-1	0	0x1x0
GPR177	0	1	0	0x1x0
GPR35	0	1	0	0x1x0
GPR68	0	1	0	0x1x0
GPR89B	0	-1	0	0x1x0
GPR89C	0	-1	0	0x1x0
GPRIN3	0	-1	0	0x1x0
GPS1	0	-1	0	0x1x0
GPSM1	0	1	0	0x1x0
GRK6	0	-1	0	0x1x0
GSDMD	0	-1	0	0x1x0
GTF2E2	0	-1	0	0x1x0
GTF2F2	0	-1	0	0x1x0
GTF2IRD2P	0	1	0	0x1x0
GYS1	0	1	0	0x1x0
GZMM	0	1	0	0x1x0
H2AFV	0	-1	0	0x1x0
H6PD	0	1	0	0x1x0
HADHB	0	1	0	0x1x0
HBQ1	0	1	0	0x1x0
HCFC1R1	0	1	0	0x1x0
HELZ	0	1	0	0x1x0
HEXB	0	-1	0	0x1x0
HIATL1	0	-1	0	0x1x0
HIBADH	0	-1	0	0x1x0
HIC2	0	1	0	0x1x0
HIPK2	0	1	0	0x1x0
HIST1H4I	0	-1	0	0x1x0
HIST2H2AA4	0	1	0	0x1x0
HLF	0	1	0	0x1x0
HMBOX1	0	1	0	0x1x0
HMGA1	0	1	0	0x1x0
HMGCL	0	1	0	0x1x0
HNRNPH3	0	-1	0	0x1x0
HNRPH3	0	-1	0	0x1x0
HPSE	0	-1	0	0x1x0
HS.123119	0	1	0	0x1x0
HS.143018	0	1	0	0x1x0
HS.147346	0	1	0	0x1x0
HS.184721	0	1	0	0x1x0
HS.193767	0	1	0	0x1x0
HS.193784	0	1	0	0x1x0
HS.194225	0	1	0	0x1x0
HS.238996	0	1	0	0x1x0
HS.266775	0	1	0	0x1x0
HS.296031	0	1	0	0x1x0
HS.348514	0	-1	0	0x1x0
HS.363526	0	1	0	0x1x0
HS.397465	0	1	0	0x1x0
HS.402146	0	1	0	0x1x0
HS.444249	0	-1	0	0x1x0
HS.46506	0	1	0	0x1x0
HS.473191	0	1	0	0x1x0
HS.482960	0	1	0	0x1x0
HS.521338	0	1	0	0x1x0
HS.529631	0	1	0	0x1x0
HS.534439	0	-1	0	0x1x0
HS.545597	0	-1	0	0x1x0
HS.546375	0	-1	0	0x1x0
HS.548635	0	1	0	0x1x0
HS.552357	0	-1	0	0x1x0
HS.558282	0	-1	0	0x1x0
HS.561363	0	-1	0	0x1x0
HS.561747	0	-1	0	0x1x0
HS.563165	0	1	0	0x1x0
HS.566573	0	1	0	0x1x0
HS.571028	0	1	0	0x1x0
HS.572219	0	-1	0	0x1x0
HS.5724	0	1	0	0x1x0
HSCB	0	1	0	0x1x0
HSD17B10	0	-1	0	0x1x0
HSD17B4	0	-1	0	0x1x0
HUWE1	0	1	0	0x1x0
HYOU1	0	-1	0	0x1x0
ICMT	0	-1	0	0x1x0
IDE	0	-1	0	0x1x0
IFI35	0	-1	0	0x1x0
IFNK	0	1	0	0x1x0
IGF2BP2	0	1	0	0x1x0
IGSF9B	0	1	0	0x1x0
IL1R2	0	1	0	0x1x0
IL1RAP	0	1	0	0x1x0
IL23R	0	1	0	0x1x0
IL26	0	1	0	0x1x0
IL27RA	0	-1	0	0x1x0
IL2RG	0	1	0	0x1x0
IL8	0	1	0	0x1x0
ILF2	0	-1	0	0x1x0
ILKAP	0	-1	0	0x1x0
IMMP2L	0	1	0	0x1x0
IMPAD1	0	1	0	0x1x0
INTS6	0	1	0	0x1x0
IPO13	0	-1	0	0x1x0
IQCB1	0	1	0	0x1x0
IQCG	0	1	0	0x1x0
ISOC1	0	-1	0	0x1x0
ITFG1	0	-1	0	0x1x0
ITPKA	0	1	0	0x1x0
IVNS1ABP	0	1	0	0x1x0
IWS1	0	-1	0	0x1x0
JAM2	0	1	0	0x1x0
JMJD2C	0	1	0	0x1x0
JMJD6	0	1	0	0x1x0
JOSD2	0	1	0	0x1x0
JPH3	0	1	0	0x1x0
JTB	0	-1	0	0x1x0
JUN	0	1	0	0x1x0
KATNB1	0	-1	0	0x1x0
KHDRBS3	0	1	0	0x1x0
KIAA0247	0	1	0	0x1x0
KIAA1012	0	-1	0	0x1x0
KIAA1160	0	-1	0	0x1x0
KIAA1244	0	1	0	0x1x0
KIAA1267	0	1	0	0x1x0
KIAA1467	0	1	0	0x1x0
KIAA1731	0	1	0	0x1x0
KIAA1826	0	-1	0	0x1x0
KIAA1958	0	1	0	0x1x0
KIF13B	0	1	0	0x1x0
KIRREL2	0	1	0	0x1x0
KL	0	1	0	0x1x0
KLHL20	0	-1	0	0x1x0
KLHL29	0	1	0	0x1x0
KLHL3	0	1	0	0x1x0
KPNA1	0	-1	0	0x1x0
KPNA2	0	-1	0	0x1x0
KRI1	0	-1	0	0x1x0
KRT81	0	1	0	0x1x0
LAMB3	0	1	0	0x1x0
LAMC1	0	1	0	0x1x0
LAMP1	0	-1	0	0x1x0
LARP4	0	-1	0	0x1x0
LCOR	0	1	0	0x1x0
LENG1	0	-1	0	0x1x0
LIG3	0	-1	0	0x1x0
LIMS1	0	1	0	0x1x0
LMO4	0	-1	0	0x1x0
LOC100128326	0	1	0	0x1x0
LOC100129086	0	-1	0	0x1x0
LOC100129144	0	1	0	0x1x0
LOC100130511	0	1	0	0x1x0
LOC100132418	0	-1	0	0x1x0
LOC100132622	0	1	0	0x1x0
LOC100132701	0	1	0	0x1x0
LOC100132795	0	1	0	0x1x0
LOC100133745	0	1	0	0x1x0
LOC100134189	0	-1	0	0x1x0
LOC100134528	0	1	0	0x1x0
LOC113386	0	-1	0	0x1x0
LOC116437	0	1	0	0x1x0
LOC148413	0	-1	0	0x1x0
LOC202134	0	1	0	0x1x0
LOC283174	0	1	0	0x1x0
LOC284276	0	1	0	0x1x0
LOC284293	0	1	0	0x1x0
LOC346887	0	1	0	0x1x0
LOC374395	0	-1	0	0x1x0
LOC387647	0	-1	0	0x1x0
LOC387882	0	-1	0	0x1x0
LOC389791	0	-1	0	0x1x0
LOC401357	0	1	0	0x1x0
LOC440125	0	-1	0	0x1x0
LOC440498	0	1	0	0x1x0
LOC440895	0	1	0	0x1x0
LOC441054	0	1	0	0x1x0
LOC441089	0	-1	0	0x1x0
LOC550112	0	1	0	0x1x0
LOC641767	0	1	0	0x1x0
LOC642033	0	-1	0	0x1x0
LOC642897	0	-1	0	0x1x0
LOC643452	0	-1	0	0x1x0
LOC643503	0	1	0	0x1x0
LOC643684	0	1	0	0x1x0
LOC643733	0	-1	0	0x1x0
LOC644347	0	1	0	0x1x0
LOC644615	0	1	0	0x1x0
LOC644880	0	1	0	0x1x0
LOC645349	0	1	0	0x1x0
LOC645732	0	-1	0	0x1x0
LOC645967	0	-1	0	0x1x0
LOC645969	0	-1	0	0x1x0
LOC647121	0	-1	0	0x1x0
LOC648130	0	-1	0	0x1x0
LOC648196	0	1	0	0x1x0
LOC648705	0	1	0	0x1x0
LOC649260	0	1	0	0x1x0
LOC649553	0	-1	0	0x1x0
LOC649555	0	-1	0	0x1x0
LOC650845	0	-1	0	0x1x0
LOC652826	0	-1	0	0x1x0
LOC652881	0	1	0	0x1x0
LOC653316	0	1	0	0x1x0
LOC653383	0	-1	0	0x1x0
LOC653631	0	-1	0	0x1x0
LOC654189	0	-1	0	0x1x0
LOC654244	0	-1	0	0x1x0
LOC654260	0	1	0	0x1x0
LOC728069	0	-1	0	0x1x0
LOC728457	0	1	0	0x1x0
LOC728537	0	1	0	0x1x0
LOC728734	0	1	0	0x1x0
LOC728739	0	-1	0	0x1x0
LOC728816	0	1	0	0x1x0
LOC729086	0	1	0	0x1x0
LOC729317	0	1	0	0x1x0
LOC729580	0	1	0	0x1x0
LOC729660	0	1	0	0x1x0
LOC729742	0	1	0	0x1x0
LOC730525	0	1	0	0x1x0
LOC730744	0	-1	0	0x1x0
LOC730883	0	-1	0	0x1x0
LOX	0	1	0	0x1x0
LPP	0	1	0	0x1x0
LRBA	0	1	0	0x1x0
LRCH3	0	1	0	0x1x0
LRG1	0	1	0	0x1x0
LRRC57	0	-1	0	0x1x0
LRRFIP1	0	1	0	0x1x0
LRWD1	0	-1	0	0x1x0
LSM1	0	-1	0	0x1x0
LSM2	0	-1	0	0x1x0
LSMD1	0	-1	0	0x1x0
LTB	0	-1	0	0x1x0
LYPLA2	0	-1	0	0x1x0
LYSMD2	0	-1	0	0x1x0
MACF1	0	1	0	0x1x0
MAEA	0	-1	0	0x1x0
MAFF	0	1	0	0x1x0
MAK	0	1	0	0x1x0
MALL	0	1	0	0x1x0
MAN1A2	0	-1	0	0x1x0
MAP1B	0	1	0	0x1x0
MAPBPIP	0	-1	0	0x1x0
MAPK1	0	-1	0	0x1x0
MAPK7	0	1	0	0x1x0
MAPKAP1	0	-1	0	0x1x0
MAPRE1	0	-1	0	0x1x0
MARCKS	0	1	0	0x1x0
2002-03-01	0	-1	0	0x1x0
MAST1	0	1	0	0x1x0
MATN4	0	1	0	0x1x0
MED12	0	1	0	0x1x0
MED20	0	1	0	0x1x0
MED27	0	-1	0	0x1x0
MED4	0	-1	0	0x1x0
MESP1	0	1	0	0x1x0
METT5D1	0	1	0	0x1x0
METTL13	0	1	0	0x1x0
METTL3	0	-1	0	0x1x0
MFHAS1	0	1	0	0x1x0
MFSD5	0	-1	0	0x1x0
MGC10997	0	1	0	0x1x0
MGC20983	0	1	0	0x1x0
MGC40489	0	-1	0	0x1x0
MGC42105	0	1	0	0x1x0
MIF4GD	0	-1	0	0x1x0
MIS12	0	-1	0	0x1x0
MKLN1	0	1	0	0x1x0
MLL	0	1	0	0x1x0
MLL3	0	1	0	0x1x0
MMP12	0	1	0	0x1x0
MMS19L	0	1	0	0x1x0
MRPL34	0	-1	0	0x1x0
MRPL36	0	-1	0	0x1x0
MRPL41	0	-1	0	0x1x0
MRPL47	0	-1	0	0x1x0
MRPS10	0	-1	0	0x1x0
MTA3	0	1	0	0x1x0
MTMR14	0	-1	0	0x1x0
MTMR6	0	-1	0	0x1x0
MUDENG	0	-1	0	0x1x0
MX1	0	-1	0	0x1x0
MYCBP	0	-1	0	0x1x0
MYD88	0	-1	0	0x1x0
MYL6B	0	1	0	0x1x0
MYO1C	0	1	0	0x1x0
MYO1F	0	-1	0	0x1x0
MYO9A	0	1	0	0x1x0
N6AMT1	0	-1	0	0x1x0
NAGS	0	1	0	0x1x0
NANOS3	0	1	0	0x1x0
NAP1L5	0	-1	0	0x1x0
NARG1	0	-1	0	0x1x0
NAT15	0	-1	0	0x1x0
NAT6	0	1	0	0x1x0
NCK2	0	1	0	0x1x0
NCOA4	0	-1	0	0x1x0
NCRNA00219	0	1	0	0x1x0
NDUFA1	0	-1	0	0x1x0
NDUFA12	0	-1	0	0x1x0
NDUFA2	0	-1	0	0x1x0
NDUFA3	0	-1	0	0x1x0
NDUFA6	0	-1	0	0x1x0
NDUFAF3	0	-1	0	0x1x0
NDUFS1	0	-1	0	0x1x0
NDUFS7	0	-1	0	0x1x0
NEIL2	0	1	0	0x1x0
NEK11	0	1	0	0x1x0
NENF	0	1	0	0x1x0
NEU4	0	1	0	0x1x0
NFATC2IP	0	-1	0	0x1x0
NFIA	0	1	0	0x1x0
NFKBIB	0	-1	0	0x1x0
NGLY1	0	1	0	0x1x0
NIP7	0	-1	0	0x1x0
NIPA2	0	-1	0	0x1x0
NIPAL4	0	1	0	0x1x0
NMB	0	1	0	0x1x0
NMT1	0	-1	0	0x1x0
NMU	0	1	0	0x1x0
NOG	0	1	0	0x1x0
NOP2	0	-1	0	0x1x0
NOTCH2	0	1	0	0x1x0
NP	0	-1	0	0x1x0
NPEPPS	0	1	0	0x1x0
NPHP3	0	1	0	0x1x0
NPHP4	0	1	0	0x1x0
NPIP	0	1	0	0x1x0
NPL	0	-1	0	0x1x0
NPLOC4	0	-1	0	0x1x0
NSMAF	0	-1	0	0x1x0
NSMCE4A	0	-1	0	0x1x0
NSUN5	0	-1	0	0x1x0
NTHL1	0	-1	0	0x1x0
NUDT11	0	1	0	0x1x0
NUDT16L1	0	-1	0	0x1x0
NUDT5	0	-1	0	0x1x0
NUDT9	0	-1	0	0x1x0
NUMA1	0	1	0	0x1x0
NUPL2	0	-1	0	0x1x0
OAS2	0	-1	0	0x1x0
OAZ2	0	1	0	0x1x0
OBSCN	0	1	0	0x1x0
ODF1	0	1	0	0x1x0
OGG1	0	-1	0	0x1x0
OKL38	0	1	0	0x1x0
ORC3L	0	1	0	0x1x0
OSAP	0	1	0	0x1x0
OSTF1	0	-1	0	0x1x0
OTOP1	0	1	0	0x1x0
OTUD6B	0	-1	0	0x1x0
PAK4	0	1	0	0x1x0
PAQR3	0	-1	0	0x1x0
PARD6A	0	-1	0	0x1x0
PARP12	0	-1	0	0x1x0
PARP14	0	-1	0	0x1x0
PARP9	0	-1	0	0x1x0
PCCB	0	-1	0	0x1x0
PCGF6	0	-1	0	0x1x0
PCYOX1L	0	-1	0	0x1x0
PDCL3	0	-1	0	0x1x0
PDE6D	0	-1	0	0x1x0
PDGFB	0	1	0	0x1x0
PDHB	0	-1	0	0x1x0
PDXK	0	1	0	0x1x0
PDZD4	0	1	0	0x1x0
PELI3	0	1	0	0x1x0
PEX11A	0	1	0	0x1x0
PGD	0	-1	0	0x1x0
PGM3	0	1	0	0x1x0
PHF20	0	1	0	0x1x0
PHF5A	0	-1	0	0x1x0
PIGS	0	-1	0	0x1x0
PIGT	0	-1	0	0x1x0
PIK3AP1	0	1	0	0x1x0
PIK3CD	0	-1	0	0x1x0
PIK3R6	0	1	0	0x1x0
PITPNA	0	-1	0	0x1x0
PLAGL1	0	1	0	0x1x0
PLAUR	0	1	0	0x1x0
PLEKHA2	0	1	0	0x1x0
PLEKHA4	0	1	0	0x1x0
PLEKHA9	0	1	0	0x1x0
PLXNA3	0	1	0	0x1x0
PNKP	0	-1	0	0x1x0
PNMA2	0	1	0	0x1x0
POLR3F	0	-1	0	0x1x0
POMGNT1	0	-1	0	0x1x0
POP5	0	-1	0	0x1x0
PPAPDC1B	0	-1	0	0x1x0
PPARD	0	1	0	0x1x0
PPARG	0	1	0	0x1x0
PPIL3	0	1	0	0x1x0
PPM1G	0	-1	0	0x1x0
PPP1R3B	0	1	0	0x1x0
PPP1R3C	0	1	0	0x1x0
PPP2CA	0	-1	0	0x1x0
PPP2CB	0	-1	0	0x1x0
PPP2R4	0	-1	0	0x1x0
PPP4C	0	-1	0	0x1x0
PPP6C	0	-1	0	0x1x0
PPT1	0	-1	0	0x1x0
PRG2	0	1	0	0x1x0
PRG4	0	1	0	0x1x0
PRKAB2	0	1	0	0x1x0
PRMT2	0	1	0	0x1x0
PRR7	0	1	0	0x1x0
PSEN2	0	-1	0	0x1x0
PSMA5	0	-1	0	0x1x0
PSMB6	0	-1	0	0x1x0
PSMB8	0	-1	0	0x1x0
PSMB9	0	-1	0	0x1x0
PSMC2	0	-1	0	0x1x0
PSMC4	0	-1	0	0x1x0
PSMC5	0	-1	0	0x1x0
PSMD7	0	-1	0	0x1x0
PSME2	0	-1	0	0x1x0
PSPC1	0	-1	0	0x1x0
PTGER1	0	1	0	0x1x0
PTGES2	0	-1	0	0x1x0
PTGR1	0	1	0	0x1x0
PTGR2	0	1	0	0x1x0
PTK6	0	1	0	0x1x0
PTPLAD1	0	-1	0	0x1x0
PTPRA	0	1	0	0x1x0
PTPRN	0	1	0	0x1x0
PTPRO	0	1	0	0x1x0
PTTG1IP	0	1	0	0x1x0
PUF60	0	-1	0	0x1x0
PYCARD	0	-1	0	0x1x0
PYGL	0	1	0	0x1x0
RAB11FIP5	0	1	0	0x1x0
RAB17	0	1	0	0x1x0
RAB35	0	-1	0	0x1x0
RAB3D	0	1	0	0x1x0
RANGAP1	0	-1	0	0x1x0
RAP1GAP	0	1	0	0x1x0
RASAL1	0	1	0	0x1x0
RASGRF2	0	1	0	0x1x0
RASGRP2	0	-1	0	0x1x0
RASGRP4	0	1	0	0x1x0
RASL11A	0	1	0	0x1x0
RASSF2	0	-1	0	0x1x0
RAX	0	1	0	0x1x0
RAXL1	0	1	0	0x1x0
RBKS	0	1	0	0x1x0
RBM15	0	1	0	0x1x0
RBM44	0	1	0	0x1x0
RBM9	0	1	0	0x1x0
RBP4	0	-1	0	0x1x0
RCN1	0	1	0	0x1x0
RCN2	0	-1	0	0x1x0
RCN3	0	1	0	0x1x0
RCOR2	0	1	0	0x1x0
REEP5	0	-1	0	0x1x0
RELL2	0	-1	0	0x1x0
RFP	0	-1	0	0x1x0
RFX5	0	-1	0	0x1x0
RFXANK	0	-1	0	0x1x0
RICS	0	1	0	0x1x0
RILPL2	0	-1	0	0x1x0
RIOK1	0	-1	0	0x1x0
RIOK3	0	1	0	0x1x0
RN7SK	0	1	0	0x1x0
RNASE4	0	1	0	0x1x0
RNASEH1	0	-1	0	0x1x0
RNF125	0	-1	0	0x1x0
RNF220	0	-1	0	0x1x0
RNF31	0	-1	0	0x1x0
RNU1-3	0	1	0	0x1x0
RPF1	0	-1	0	0x1x0
RPGRIP1	0	1	0	0x1x0
RPL23A	0	1	0	0x1x0
RPL23AP13	0	1	0	0x1x0
RPRC1	0	-1	0	0x1x0
RPUSD2	0	-1	0	0x1x0
RRAGA	0	1	0	0x1x0
RRAGD	0	1	0	0x1x0
RRP8	0	-1	0	0x1x0
RSAD1	0	-1	0	0x1x0
RSF1	0	1	0	0x1x0
RUNDC3B	0	1	0	0x1x0
RWDD1	0	-1	0	0x1x0
RWDD4A	0	-1	0	0x1x0
S100A13	0	1	0	0x1x0
SAC3D1	0	-1	0	0x1x0
SAMD4B	0	1	0	0x1x0
SCAMP1	0	1	0	0x1x0
SCAPER	0	1	0	0x1x0
SCARB1	0	1	0	0x1x0
SCPEP1	0	-1	0	0x1x0
SCRIB	0	-1	0	0x1x0
SDAD1	0	-1	0	0x1x0
SDCCAG1	0	-1	0	0x1x0
SDCCAG3	0	1	0	0x1x0
SDF2L1	0	-1	0	0x1x0
SDHB	0	-1	0	0x1x0
SEC22C	0	-1	0	0x1x0
SELL	0	-1	0	0x1x0
SEMA4B	0	1	0	0x1x0
SEMA4D	0	1	0	0x1x0
SEPHS1	0	-1	0	0x1x0
2010-09-01	0	1	0	0x1x0
SERPINH1	0	1	0	0x1x0
SERTAD1	0	1	0	0x1x0
SETBP1	0	1	0	0x1x0
SETD1B	0	-1	0	0x1x0
SFRS6	0	-1	0	0x1x0
SFTPD	0	1	0	0x1x0
SH3BGRL3	0	-1	0	0x1x0
SH3GL3	0	1	0	0x1x0
SHARPIN	0	-1	0	0x1x0
SHB	0	1	0	0x1x0
SKP1	0	-1	0	0x1x0
SLAMF8	0	-1	0	0x1x0
SLC12A6	0	1	0	0x1x0
SLC16A6	0	-1	0	0x1x0
SLC25A24	0	1	0	0x1x0
SLC25A25	0	-1	0	0x1x0
SLC25A26	0	1	0	0x1x0
SLC25A3	0	-1	0	0x1x0
SLC25A39	0	-1	0	0x1x0
SLC29A4	0	1	0	0x1x0
SLC2A14	0	1	0	0x1x0
SLC2A6	0	-1	0	0x1x0
SLC38A5	0	1	0	0x1x0
SLC39A1	0	1	0	0x1x0
SLC39A6	0	1	0	0x1x0
SLC6A10P	0	1	0	0x1x0
SLC8A3	0	1	0	0x1x0
SLC9A3R1	0	-1	0	0x1x0
SLC9A5	0	1	0	0x1x0
SMG1	0	1	0	0x1x0
SMYD2	0	1	0	0x1x0
SNCA	0	-1	0	0x1x0
SND1	0	1	0	0x1x0
SNORD48	0	-1	0	0x1x0
SNRPA	0	1	0	0x1x0
SNX11	0	-1	0	0x1x0
SNX19	0	-1	0	0x1x0
SNX4	0	-1	0	0x1x0
SOCS4	0	-1	0	0x1x0
SORL1	0	1	0	0x1x0
SP2	0	-1	0	0x1x0
SPAST	0	-1	0	0x1x0
SPATA2	0	-1	0	0x1x0
SPATA7	0	1	0	0x1x0
SPATS2	0	1	0	0x1x0
SPCS1	0	-1	0	0x1x0
SPCS3	0	-1	0	0x1x0
SPN	0	-1	0	0x1x0
SPPL2A	0	-1	0	0x1x0
SPRY2	0	1	0	0x1x0
SPRYD3	0	-1	0	0x1x0
SPTLC1	0	1	0	0x1x0
SR140	0	1	0	0x1x0
SRF	0	-1	0	0x1x0
SRP19	0	-1	0	0x1x0
SRPR	0	-1	0	0x1x0
SSNA1	0	-1	0	0x1x0
SSU72	0	-1	0	0x1x0
STAMBP	0	1	0	0x1x0
STC1	0	1	0	0x1x0
STEAP1	0	1	0	0x1x0
STRADA	0	-1	0	0x1x0
STX12	0	1	0	0x1x0
SYDE1	0	1	0	0x1x0
SYN1	0	1	0	0x1x0
TACC1	0	-1	0	0x1x0
TADA1L	0	-1	0	0x1x0
TADA3	0	1	0	0x1x0
TALDO1	0	-1	0	0x1x0
TANC2	0	1	0	0x1x0
TAP1	0	-1	0	0x1x0
TATDN3	0	-1	0	0x1x0
TAX1BP3	0	-1	0	0x1x0
TBC1D2	0	-1	0	0x1x0
TBC1D22A	0	1	0	0x1x0
TBC1D7	0	-1	0	0x1x0
TCEAL5	0	-1	0	0x1x0
TCEB2	0	-1	0	0x1x0
TEAD4	0	1	0	0x1x0
TEK	0	1	0	0x1x0
TGFB3	0	1	0	0x1x0
TGFBR2	0	1	0	0x1x0
TGIF2	0	1	0	0x1x0
TGM5	0	1	0	0x1x0
THOC5	0	-1	0	0x1x0
TIAL1	0	1	0	0x1x0
TICAM2	0	1	0	0x1x0
TIPRL	0	-1	0	0x1x0
TLE3	0	1	0	0x1x0
TM9SF4	0	1	0	0x1x0
TMEM1	0	-1	0	0x1x0
TMEM126B	0	-1	0	0x1x0
TMEM145	0	1	0	0x1x0
TMEM160	0	-1	0	0x1x0
TMEM165	0	-1	0	0x1x0
TMEM183A	0	-1	0	0x1x0
TMEM183B	0	-1	0	0x1x0
TMEM19	0	-1	0	0x1x0
TMEM20	0	-1	0	0x1x0
TMEM33	0	-1	0	0x1x0
TMEM43	0	1	0	0x1x0
TMEM5	0	-1	0	0x1x0
TMEM60	0	-1	0	0x1x0
TMEM70	0	-1	0	0x1x0
TMEM9	0	1	0	0x1x0
TMPO	0	-1	0	0x1x0
TMPRSS3	0	1	0	0x1x0
TMPRSS6	0	1	0	0x1x0
TMPRSS7	0	1	0	0x1x0
TMSL3	0	-1	0	0x1x0
TNFAIP3	0	1	0	0x1x0
TNFRSF10D	0	1	0	0x1x0
TNFRSF11A	0	1	0	0x1x0
TNFRSF21	0	1	0	0x1x0
TNIP2	0	1	0	0x1x0
TOB1	0	-1	0	0x1x0
TOMM40L	0	-1	0	0x1x0
TOMM70A	0	-1	0	0x1x0
TOR1A	0	-1	0	0x1x0
TOR3A	0	-1	0	0x1x0
TPR	0	1	0	0x1x0
TRAK2	0	-1	0	0x1x0
TRAPPC4	0	-1	0	0x1x0
TRAT1	0	-1	0	0x1x0
TRIM27	0	-1	0	0x1x0
TRIT1	0	1	0	0x1x0
TSC1	0	1	0	0x1x0
TSEN2	0	-1	0	0x1x0
TSKU	0	1	0	0x1x0
TSSC4	0	-1	0	0x1x0
TST	0	-1	0	0x1x0
TSTA3	0	-1	0	0x1x0
TTC3	0	1	0	0x1x0
TTF2	0	-1	0	0x1x0
TUBB2B	0	1	0	0x1x0
TXNDC14	0	-1	0	0x1x0
TXNRD1	0	-1	0	0x1x0
TYW1B	0	-1	0	0x1x0
UBE2A	0	-1	0	0x1x0
UBE2G1	0	-1	0	0x1x0
UBE2G2	0	-1	0	0x1x0
UBE2J2	0	-1	0	0x1x0
UBE2L3	0	-1	0	0x1x0
UBE2L6	0	-1	0	0x1x0
UBE2O	0	1	0	0x1x0
UBIAD1	0	-1	0	0x1x0
UNC50	0	-1	0	0x1x0
UNC84B	0	-1	0	0x1x0
UQCC	0	1	0	0x1x0
UQCRFS1	0	-1	0	0x1x0
USP12	0	1	0	0x1x0
USP38	0	-1	0	0x1x0
USP39	0	-1	0	0x1x0
UST	0	1	0	0x1x0
UTP14C	0	-1	0	0x1x0
UTP18	0	-1	0	0x1x0
VAV1	0	-1	0	0x1x0
VDAC3	0	1	0	0x1x0
VLDLR	0	1	0	0x1x0
VOPP1	0	1	0	0x1x0
VPS37C	0	1	0	0x1x0
VPS37D	0	1	0	0x1x0
VPS41	0	1	0	0x1x0
WASF2	0	1	0	0x1x0
WASF3	0	1	0	0x1x0
WASPIP	0	-1	0	0x1x0
WBP5	0	1	0	0x1x0
WDFY2	0	1	0	0x1x0
WDR1	0	-1	0	0x1x0
WDR25	0	-1	0	0x1x0
WDR45L	0	1	0	0x1x0
WDR59	0	1	0	0x1x0
WDR6	0	1	0	0x1x0
WDR90	0	1	0	0x1x0
WIPF1	0	-1	0	0x1x0
WNT1	0	1	0	0x1x0
WNT10A	0	1	0	0x1x0
XPNPEP1	0	1	0	0x1x0
YTHDF1	0	-1	0	0x1x0
ZBTB17	0	1	0	0x1x0
ZC3H12C	0	1	0	0x1x0
ZCCHC7	0	1	0	0x1x0
ZDHHC11B	0	-1	0	0x1x0
ZDHHC9	0	1	0	0x1x0
ZFAND6	0	-1	0	0x1x0
ZFP82	0	1	0	0x1x0
ZFR	0	1	0	0x1x0
ZFYVE19	0	1	0	0x1x0
ZGPAT	0	-1	0	0x1x0
ZIK1	0	1	0	0x1x0
ZMPSTE24	0	-1	0	0x1x0
ZMYM2	0	1	0	0x1x0
ZMYM3	0	1	0	0x1x0
ZNF146	0	1	0	0x1x0
ZNF148	0	1	0	0x1x0
ZNF23	0	1	0	0x1x0
ZNF264	0	1	0	0x1x0
ZNF274	0	1	0	0x1x0
ZNF292	0	1	0	0x1x0
ZNF296	0	1	0	0x1x0
ZNF358	0	1	0	0x1x0
ZNF384	0	1	0	0x1x0
ZNF426	0	1	0	0x1x0
ZNF438	0	1	0	0x1x0
ZNF451	0	1	0	0x1x0
ZNF525	0	1	0	0x1x0
ZNF548	0	1	0	0x1x0
ZNF558	0	1	0	0x1x0
ZNF655	0	-1	0	0x1x0
ZNF673	0	1	0	0x1x0
ZNF689	0	-1	0	0x1x0
ZNF7	0	1	0	0x1x0
ZNF773	0	1	0	0x1x0
ZNF827	0	1	0	0x1x0
ZZEF1	0	-1	0	0x1x0
AKR1C4	0	0	-1	0x0x1
AP1GBP1	0	0	-1	0x0x1
ARAF	0	0	-1	0x0x1
ATF7IP2	0	0	-1	0x0x1
ATP6V1G1	0	0	-1	0x0x1
BBS4	0	0	-1	0x0x1
BOLA1	0	0	-1	0x0x1
C14ORF166	0	0	-1	0x0x1
C16ORF74	0	0	-1	0x0x1
C17ORF96	0	0	1	0x0x1
C1ORF156	0	0	-1	0x0x1
C20ORF196	0	0	-1	0x0x1
C6ORF192	0	0	-1	0x0x1
C9ORF46	0	0	-1	0x0x1
CANT1	0	0	1	0x0x1
CARD16	0	0	-1	0x0x1
CCDC66	0	0	-1	0x0x1
CCDC74A	0	0	1	0x0x1
CD300C	0	0	1	0x0x1
CD47	0	0	-1	0x0x1
CHMP2A	0	0	-1	0x0x1
CKB	0	0	1	0x0x1
CKS1B	0	0	1	0x0x1
CLIC1	0	0	1	0x0x1
CLIC3	0	0	-1	0x0x1
CRIP2	0	0	1	0x0x1
CSNK1D	0	0	1	0x0x1
CTNNA1	0	0	1	0x0x1
CYP1A1	0	0	1	0x0x1
DDIT4	0	0	1	0x0x1
EGR1	0	0	1	0x0x1
ELA3A	0	0	-1	0x0x1
EMP3	0	0	1	0x0x1
ENO1	0	0	1	0x0x1
ERLIN1	0	0	1	0x0x1
FLJ16331	0	0	-1	0x0x1
FLJ32255	0	0	-1	0x0x1
FLJ33996	0	0	-1	0x0x1
GAK	0	0	-1	0x0x1
GLRX	0	0	-1	0x0x1
GNL1	0	0	1	0x0x1
GRAP	0	0	-1	0x0x1
HIGD2A	0	0	-1	0x0x1
HMHA1	0	0	-1	0x0x1
HPS5	0	0	-1	0x0x1
HS.133324	0	0	-1	0x0x1
HS.187816	0	0	1	0x0x1
HS.495112	0	0	-1	0x0x1
HS.505364	0	0	-1	0x0x1
HS.527071	0	0	-1	0x0x1
HS.558488	0	0	-1	0x0x1
HS.567477	0	0	-1	0x0x1
HS.567480	0	0	-1	0x0x1
HS.567677	0	0	-1	0x0x1
HS.568058	0	0	-1	0x0x1
HS.7572	0	0	-1	0x0x1
HSPA2	0	0	1	0x0x1
IGFBP4	0	0	1	0x0x1
IKBIP	0	0	1	0x0x1
IL7R	0	0	-1	0x0x1
JUND	0	0	1	0x0x1
KCNN4	0	0	1	0x0x1
KEAP1	0	0	1	0x0x1
KLHL22	0	0	-1	0x0x1
KLHL9	0	0	-1	0x0x1
KLRG1	0	0	-1	0x0x1
LGALS1	0	0	1	0x0x1
LIPT1	0	0	-1	0x0x1
LMNA	0	0	1	0x0x1
LOC100128585	0	0	-1	0x0x1
LOC100130298	0	0	-1	0x0x1
LOC100130633	0	0	-1	0x0x1
LOC100132116	0	0	1	0x0x1
LOC100132510	0	0	-1	0x0x1
LOC100133627	0	0	1	0x0x1
LOC144383	0	0	-1	0x0x1
LOC642453	0	0	-1	0x0x1
LOC643903	0	0	1	0x0x1
LOC643977	0	0	-1	0x0x1
LOC645868	0	0	-1	0x0x1
LOC647850	0	0	-1	0x0x1
LOC650103	0	0	-1	0x0x1
LOC728188	0	0	1	0x0x1
LOC729438	0	0	-1	0x0x1
LOC732007	0	0	1	0x0x1
LYRM1	0	0	-1	0x0x1
MAD2L2	0	0	1	0x0x1
MBOAT7	0	0	1	0x0x1
MCOLN2	0	0	-1	0x0x1
MEGF9	0	0	-1	0x0x1
MIOX	0	0	-1	0x0x1
MLYCD	0	0	-1	0x0x1
MRFAP1L1	0	0	-1	0x0x1
MRPS14	0	0	-1	0x0x1
MTMR9	0	0	-1	0x0x1
NDUFB10	0	0	-1	0x0x1
NME4	0	0	1	0x0x1
NSMCE1	0	0	-1	0x0x1
OCRL	0	0	1	0x0x1
PDIA6	0	0	1	0x0x1
PER1	0	0	1	0x0x1
PEX16	0	0	-1	0x0x1
PGAM1	0	0	1	0x0x1
PGAM4	0	0	1	0x0x1
PHLDA1	0	0	1	0x0x1
PHLPP1	0	0	1	0x0x1
PIP3-E	0	0	-1	0x0x1
PKM2	0	0	1	0x0x1
PLEKHH3	0	0	1	0x0x1
PLOD3	0	0	1	0x0x1
POLR2G	0	0	-1	0x0x1
POLR2K	0	0	-1	0x0x1
PPP1R11	0	0	-1	0x0x1
PPP1R14B	0	0	1	0x0x1
PRDM1	0	0	1	0x0x1
PRDX4	0	0	1	0x0x1
PRKACB	0	0	-1	0x0x1
PRKAG1	0	0	-1	0x0x1
REEP6	0	0	-1	0x0x1
RLN1	0	0	-1	0x0x1
RLN2	0	0	-1	0x0x1
RNF5P1	0	0	1	0x0x1
RSU1	0	0	-1	0x0x1
RTP4	0	0	-1	0x0x1
S100A14	0	0	1	0x0x1
SCARA5	0	0	1	0x0x1
SCNM1	0	0	-1	0x0x1
SENP2	0	0	1	0x0x1
SERPINE2	0	0	1	0x0x1
SGCE	0	0	1	0x0x1
SH2B2	0	0	1	0x0x1
SLC4A7	0	0	-1	0x0x1
SMPD1	0	0	-1	0x0x1
SURF1	0	0	-1	0x0x1
TAF1L	0	0	-1	0x0x1
TAGLN2	0	0	1	0x0x1
TCEA3	0	0	1	0x0x1
TIA1	0	0	-1	0x0x1
TMEM141	0	0	-1	0x0x1
TMEM194A	0	0	1	0x0x1
TTLL1	0	0	-1	0x0x1
TTLL7	0	0	1	0x0x1
TXNDC11	0	0	1	0x0x1
UBASH3B	0	0	-1	0x0x1
VGF	0	0	1	0x0x1
VNN2	0	0	-1	0x0x1
YIPF4	0	0	-1	0x0x1
ZFP1	0	0	1	0x0x1
ZFP62	0	0	-1	0x0x1
ZMAT2	0	0	-1	0x0x1
ZMYM6	0	0	-1	0x0x1
ZNF362	0	0	-1	0x0x1
